# Supplementary material for: In vivo binding of PRDM9 reveals interactions with noncanonical genomic sites
Source: PubMed Central journal article supplement (PMC5378176; doi:10.1101/gr.217240.116), 2017-04
Supplement: supp_gr.217240.116_Supplemental_Fig_S8.pdf [file supp_gr.217240.116_Supplemental_Fig_S8.pdf]

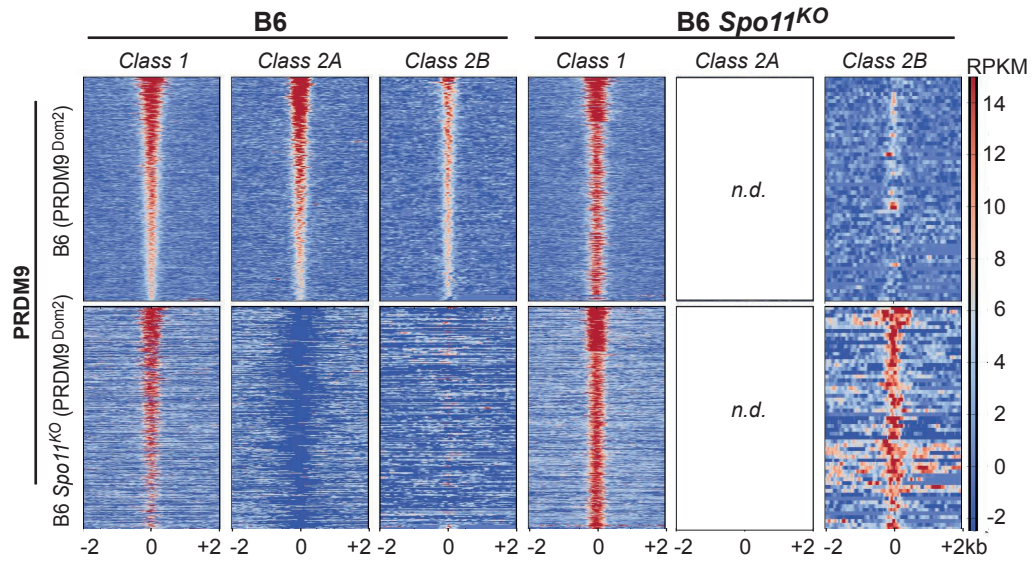

**Supplemental Figure S8** In B6 *Spo11*<sup>KO</sup> mice, class 2A are absent. Heatmaps of PRDM9 read distribution centered on class 1, 2A and 2B PRDM9 peaks in B6 and B6 *Spo11*<sup>KO</sup> mice, n.d. : not determined (only one class 2A peak was identified in B6 *Spo11*<sup>KO</sup> mice).
