# Supplementary material for: In vivo binding of PRDM9 reveals interactions with noncanonical genomic sites
Source: PubMed Central journal article supplement (PMC5378176; doi:10.1101/gr.217240.116), 2017-04
Supplement: supp_gr.217240.116_Supplemental_Fig_S9.pdf [file supp_gr.217240.116_Supplemental_Fig_S9.pdf]

## Supplemental Figure 9

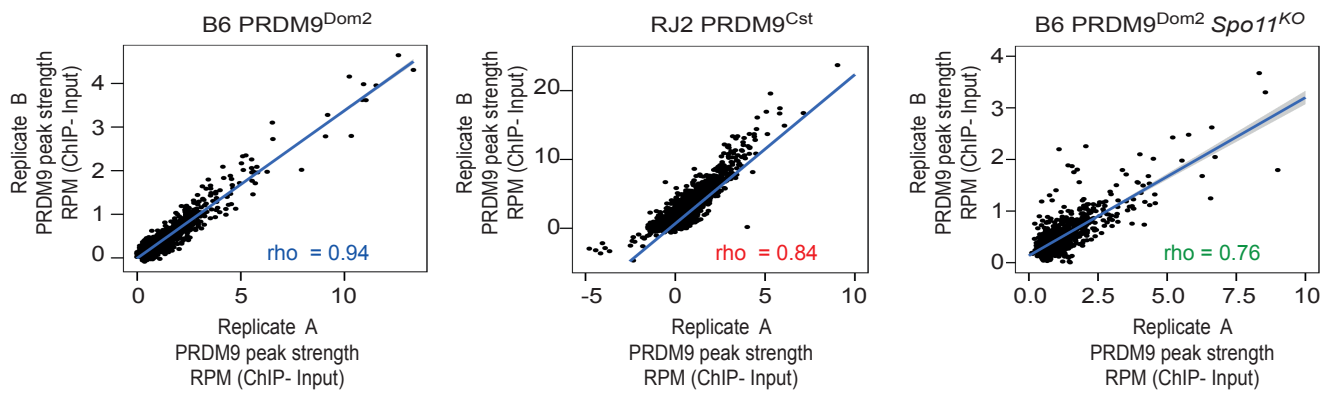

**Supplemental Figure S9** PRDM9 ChIP-seq in B6, RJ2 and B6 *Spo11*<sup>KO</sup> mice are reproducible. Scatter plots of PRDM9 strength (RPM) in replicate A versus replicate B. Left: B6, Middle: RJ2, Right: B6 *Spo11*<sup>KO</sup>. Rho is the Spearman correlation coefficient.
