# Supplementary material for: In vivo binding of PRDM9 reveals interactions with noncanonical genomic sites
Source: PubMed Central journal article supplement (PMC5378176; doi:10.1101/gr.217240.116), 2017-04
Supplement: supp_gr.217240.116_Supplemental_Table_S1.pdf [file supp_gr.217240.116_Supplemental_Table_S1.pdf]

## Supplemental Table S1

## List of ChIP-seq experiments performed

|             | Antibody | Experiment | Replicate | Sequencing | Read Number | Accession Number |
|-------------|----------|------------|-----------|------------|-------------|------------------|
| B6          | PRDM9    | ChIPseq    | 1         | PE 100bp   | 162Mx2      | GSM2465574       |
| B6          | PRDM9    | Input      | 1         | PE 100bp   | 152Mx2      | GSM2465575       |
| B6          | PRDM9    | ChIPseq    | 2         | PE 100bp   | 168Mx2      | GSM2465576       |
| B6          | PRDM9    | Input      | 2         | PE 100bp   | 158Mx2      | GSM2465577       |
| RJ2         | PRDM9    | ChIPseq    | 1         | PE 100bp   | 94Mx2       | GSM2465578       |
| RJ2         | PRDM9    | Input      | 1         | PE 100bp   | 115Mx2      | GSM2465579       |
| RJ2         | PRDM9    | ChIPseq    | 2         | PE 100bp   | 136Mx2      | GSM2465580       |
| RJ2         | PRDM9    | Input      | 2         | PE 100bp   | 113Mx2      | GSM2465581       |
| B6_PRDM9_KO | PRDM9    | ChIPseq    | 1         | SE 50bp    | 186M        | GSM2465582       |
| B6_PRDM9_KO | PRDM9    | Input      | 1         | SE 50bp    | 154M        | GSM2465583       |
| B6_SPO11_KO | PRDM9    | ChIPseq    | 1         | PE 100bp   | 104Mx2      | GSM2465584       |
| B6_SPO11_KO | PRDM9    | Input      | 1         | PE 100bp   | 104Mx2      | GSM2465585       |
| B6_SPO11_KO | PRDM9    | ChIPseq    | 2         | PE 100bp   | 117Mx2      | GSM2465586       |
| B6_SPO11_KO | PRDM9    | Input      | 2         | PE 100bp   | 97Mx2       | GSM2465587       |
| B6          | H3K4me3  | ChIPseq    | 1         | SE 36bp    | 44Mx2       | GSM2465588       |
| B6          | H3K4me3  | Input      | 1         | SE 36bp    | 46Mx2       | GSM2465589       |
| RJ2         | H3K4me3  | ChIPseq    | 1         | SE 36bp    | 44Mx2       | GSM2465590       |
| RJ2         | H3K4me3  | Input      | 1         | SE 36bp    | 46Mx2       | GSM2465591       |
| B6          | DMC1     | SSDS       | 1         | PE 50bp    | 120Mx2      | GSM2465592       |
| B6          | DMC1     | SSDS       | 2         | PE 50bp    | 142Mx2      | GSM2465593       |
| RJ2         | DMC1     | SSDS       | 1         | PE 50bp    | 122Mx2      | GSM2465594       |
| RJ2         | DMC1     | SSDS       | 2         | PE 50bp    | 126Mx2      | GSM2465595       |
| B6          | H3K36me3 | ChIPseq    | 1         | SE 50bp    | 182M        | GSM2465596       |
| B6          | H3K36me3 | Input      | 1         | SE 50bp    | 153M        | GSM2465597       |
| B6          | H3K36me3 | ChIPseq    | 2         | SE 50bp    | 114M        | GSM2465598       |
| B6          | H3K36me3 | Input      | 2         | SE 50bp    | 173M        | GSM2465599       |
| RJ2         | H3K36me3 | ChIPseq    | 1         | SE 50bp    | 178M        | GSM2465600       |
| RJ2         | H3K36me3 | Input      | 1         | SE 50bp    | 152M        | GSM2465601       |
| RJ2         | H3K36me3 | ChIPseq    | 2         | SE 50bp    | 244M        | GSM2465602       |
| B6_SPO11_KO | H3K36me3 | ChIPseq    | 1         | SE 50bp    | 154M        | GSM2465603       |
| B6_SPO11_KO | H3K36me3 | Input      | 1         | SE 50bp    | 148M        | GSM2465604       |
| B6_SPO11_KO | H3K36me3 | ChIPseq    | 2         | SE 50bp    | 131M        | GSM2465605       |

**Supplemental Table S1** Summary of all ChIP-seq experiments performed, indicating genotype, antibodies, sequencing conditions used, number of mapped reads and accession numbers.
